# Supplementary material
Source: PubMed Central journal article supplement (PMC7616895)
Supplement: EMS146549-supplement-Supplementary_Material.pdf [file EMS146549-supplement-Supplementary_Material.pdf]

## Supplementary Materials

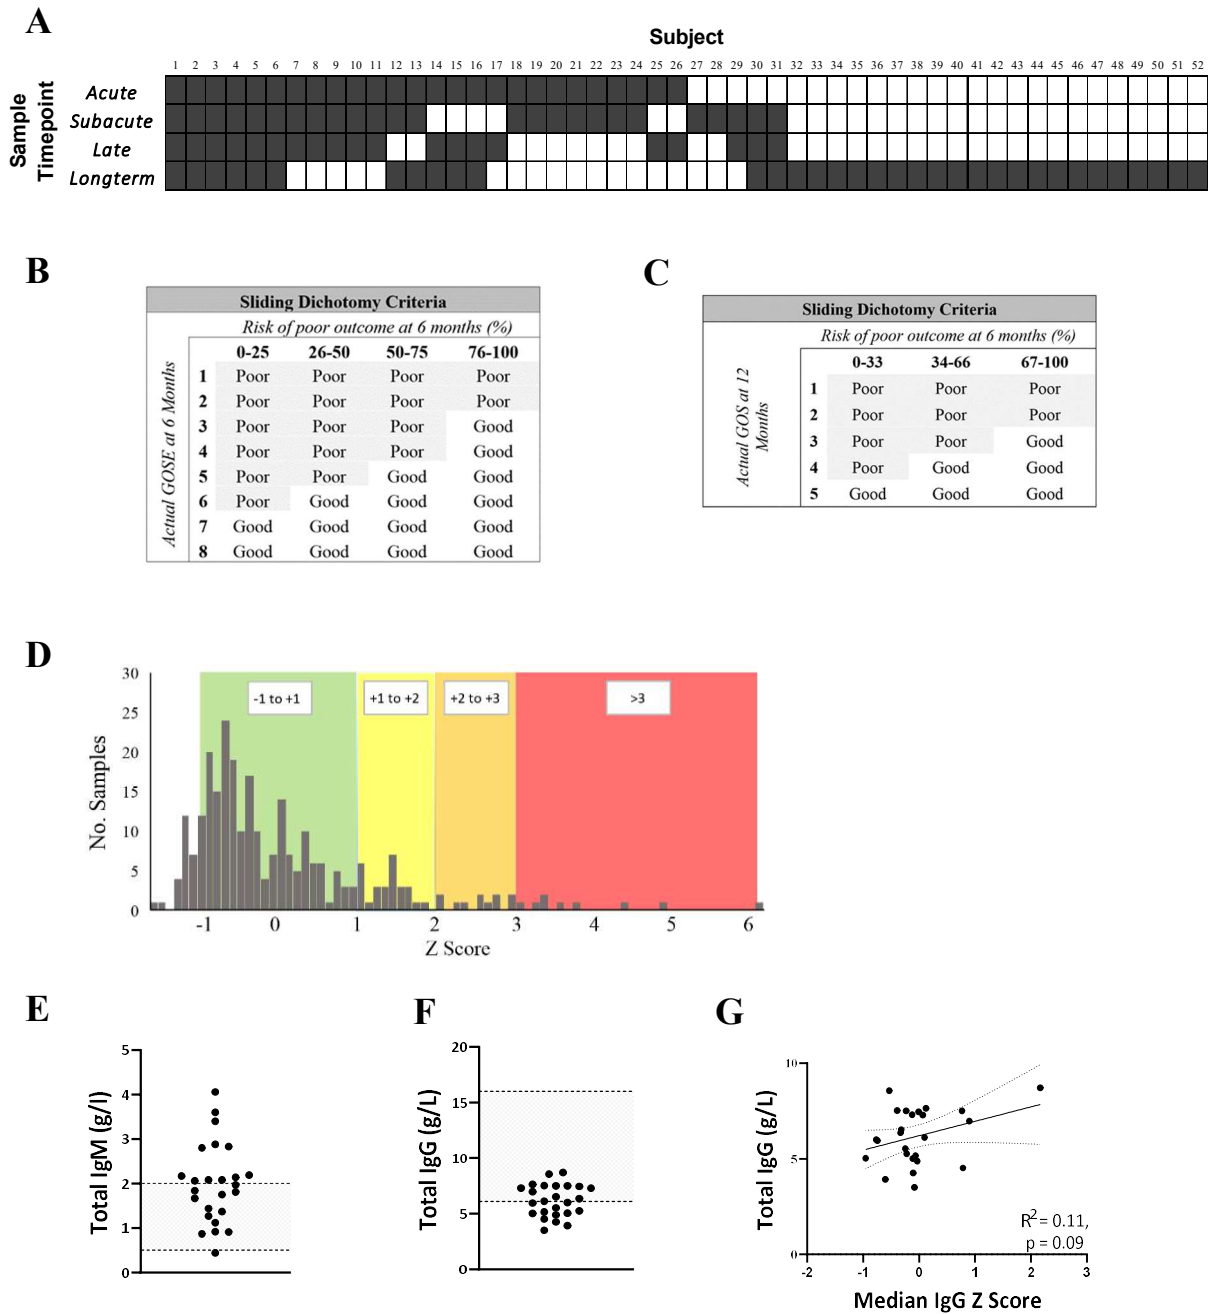

**Supplementary Figure 1.** Schematic diagram displaying how patients from the Discovery cohort contributed to the Late and Long-term cohorts. *Shaded boxes represent time-points where samples were taken from individuals (A).* Criteria used to dichotomise patients' outcome into "worse than expected" and "as/better than expected" groups, according to their risk of poor outcome as judged by the IMPACT score variables for the Discovery cohort (B) and Validation cohort (C). Histogram displaying the distribution of Z scores of IgG MAG MFI in all samples used to generate the reference distributions (D). Total serum IgM concentrations was above the normal range in 12/25 patients. *Hatched area = normal range (E).* Total serum IgG concentration was below the normal range in 13/25 patients. *Hatched area = normal range (F).* Median IgG Z score did not correlate with total serum IgG (G).

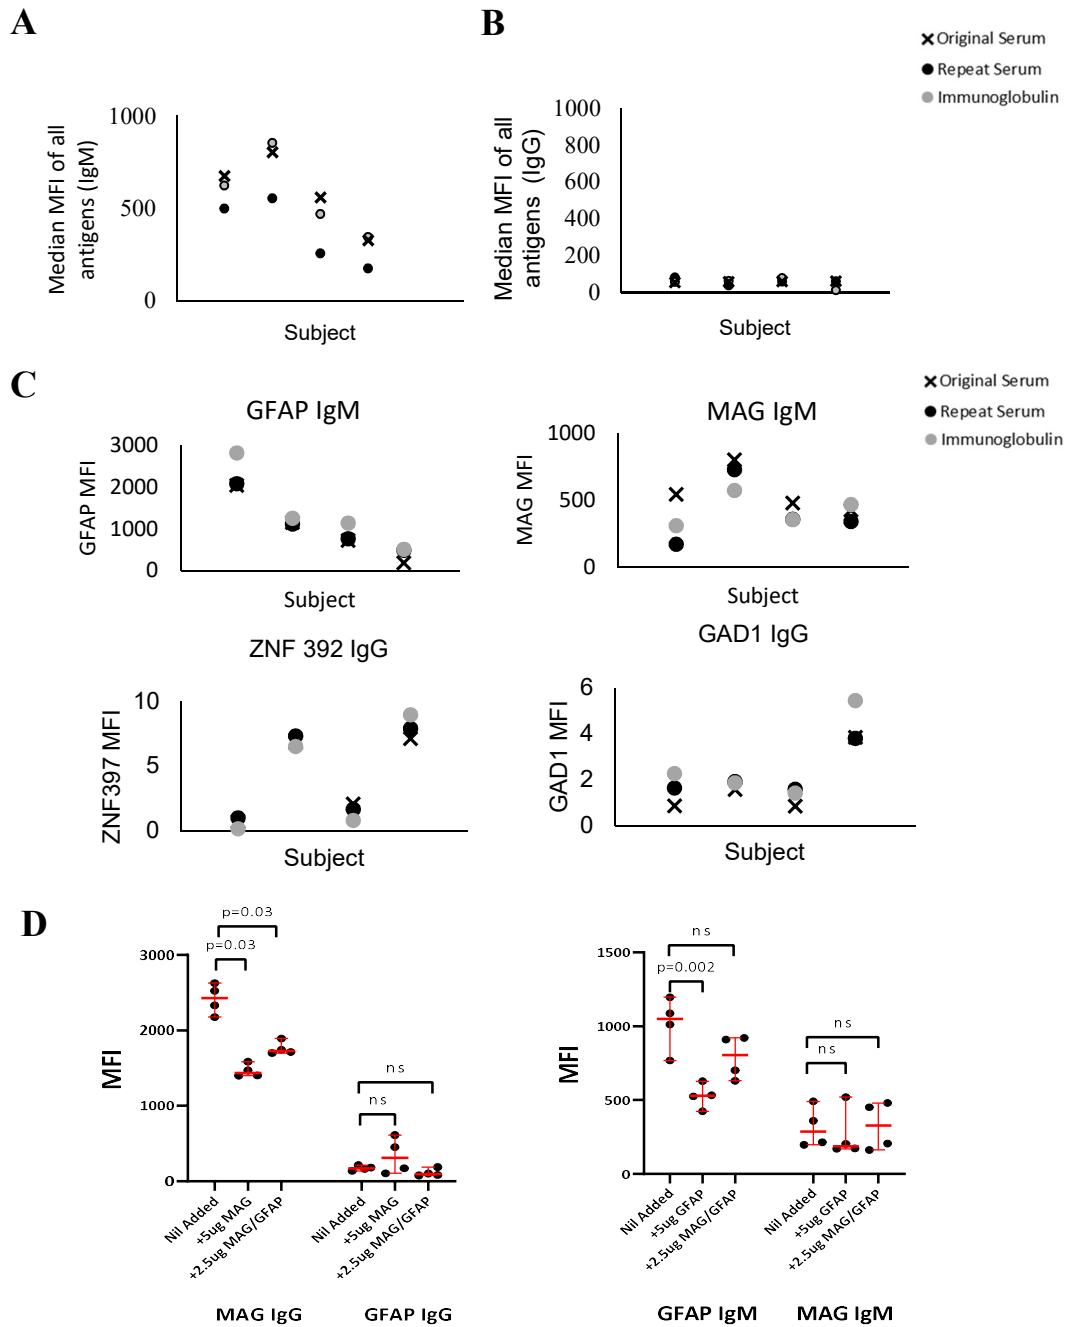

**Supplementary Figure 2.** (A) Polyantigenic IgM response is replicated both in a technical repeat (serum assayed again in a separate experiment) and in the purified immunoglobulin fraction (B) no such replication is seen with IgG (C) Graphs displaying replication of dominant responses to specific antigens both in a technical repeat (serum assayed again in a separate experiment) and in the purified immunoglobulin fraction (D) To assess the antigen-specificity of the autoantibodies, two serum samples positive for anti-MAG IgG and anti-GFAP IgM respectively were pre-incubated with the corresponding cognate antigen. 200 ul serum was incubated for two hours at room temperature in the presence of 1) excess antigen (5 mcg of MAG or GFAP as appropriate), 2) 2.5 mcg of both MAG and GFAP to assess the effect of total protein added versus specific cognate antigen, and 3) with no antigen added. The samples were then diluted to 1 in 1000 and run as standard on the protein microarray. Maximal attenuation of the positive autoantibody signal was seen when serum was pre-incubated with the cognate antigen; no difference was seen in negative autoantibody signals.

## Supplementary Material

| Supplementary Table 1. Custom Protein Microarray Protein List |                                                                      |          |                               |                                                           |           |
|---------------------------------------------------------------|----------------------------------------------------------------------|----------|-------------------------------|-----------------------------------------------------------|-----------|
| Symbol                                                        | Protein Name                                                         | Location | Symbol                        | Protein Name                                              | Location  |
| <b>Brain relevant (52)</b>                                    |                                                                      |          |                               |                                                           |           |
| Aβ 42*                                                        | Amyloid Beta 42                                                      | EC/PM    | PNMA1                         | Paraneoplastic Ma Antigen 1                               | IC        |
| ANXA4                                                         | Annexin A4                                                           | PM       | PNMA2                         | Paraneoplastic Ma Antigen 2                               | IC        |
| APP                                                           | Amyloid Precursor Protein                                            | EC/PM    | S100B                         | S100 calcium-binding protein B                            | EC        |
| AQP4*                                                         | Aquaporin-4                                                          | PM       | SNCA                          | alpha-synuclein                                           | IC        |
| CDH13                                                         | Cadherin 13                                                          | EC/PM    | SSB                           | Sjogren Syndrome Antigen B (La)                           | IC        |
| CDR2                                                          | Cerebellar Degeneration Related Protein 2 (Yo; Purkinje)             | IC       | Tau*                          | Tau - 441                                                 | EC/PM     |
| CHRNA10                                                       | Cholinergic Receptor Nicotinic Alpha 10 Subunit                      | PM       | TPH1                          | Tryptophan Hydroxylase 1                                  | IC        |
| CHRNA9                                                        | Cholinergic Receptor Nicotinic Alpha 9 Subunit                       | PM       | TROVE2                        | TROVE Domain Family Member 2 (Ssa/Ro)                     | IC        |
| COL4A3BP                                                      | Collagen Type IV Alpha 3 Binding Protein                             | EC       | TUBB3                         | Tubulin Beta 3                                            | IC        |
| DCN                                                           | Decorin                                                              | EC       | ZIC4                          | Zinc finger protein                                       | IC        |
| DPYSL5                                                        | Dihydropyrimidinase-related protein 5 (CRMP5)                        | IC       | <b>BBB Relevant (5)</b>       |                                                           |           |
| DRD2                                                          | Dopamine receptor D2                                                 | PM       | BSG                           | Basigin                                                   | PM        |
| ELAVL4                                                        | (Embryonic Lethal, Abnormal Vision, Drosophila)-Like 4               | IC       | CLDN5                         | Claudin 5                                                 | PM        |
| GABBR1                                                        | Gamma-Aminobutyric Acid Type B Receptor Subunit 1                    | PM       | LAMC2                         | Laminin Subunit Gamma 2                                   | PM        |
| GABRA1                                                        | Gamma-Aminobutyric Acid Type A Receptor Alpha1 Subunit               | PM       | TJP1                          | Tight Junction Protein 1                                  | PM        |
| GABRB3                                                        | Gamma-Aminobutyric Acid Type A Receptor Beta3 Subunit                | PM       | SELE                          | E-Selectin                                                | EC/PM     |
| GAD1                                                          | Glutamate decarboxylase 1 (brain, 67kDa)                             | PM       | <b>Non-CNS / Control (22)</b> |                                                           |           |
| GAD2                                                          | Glutamate decarboxylase 2 (65, kDa)                                  | PM       | ACE                           | Angiotensin Converting Enzyme                             | EC/PM     |
| GFAP                                                          | Glial Fibrillary Acidic Protein                                      | IC       | BSA                           | Bovine Serum Albumin                                      | Non-human |
| GLRA1                                                         | Glycine Receptor Alpha 1                                             | PM       | BSA-bio                       | Bovine Serum Albumin - biotinylated                       | Non-human |
| GRIA2                                                         | Glutamate Ionotropic Receptor AMPA Type Subunit 2                    | PM       | CDH1                          | Cadherin 1                                                | EC/PM     |
| GRIA3                                                         | Glutamate Ionotropic Receptor AMPA Type Subunit 3                    | PM       | CEACAM1                       | Carcinoembryonic Antigen Related Cell Adhesion Molecule 1 | EC/PM     |
| GRIA4                                                         | Glutamate Ionotropic Receptor AMPA Type Subunit 4                    | PM       | CEACAM5                       | Carcinoembryonic Antigen Related Cell Adhesion Molecule 5 | EC/PM     |
| GRIN1                                                         | Glutamate Ionotropic Receptor NMDA Type Subunit 1                    | PM       | CENPB                         | Centromere protein B                                      | IC        |
| GRIN2A                                                        | Glutamate Ionotropic Receptor NMDA Type Subunit 2A                   | PM       | CENPH                         | Centromere Protein H                                      | IC        |
| GRIN3A                                                        | Glutamate Ionotropic Receptor NMDA Type Subunit 3A                   | PM       | COL1A1                        | Collagen, type I, alpha 1                                 | EC        |
| GRIN3B                                                        | Glutamate Ionotropic Receptor NMDA Type Subunit 3B                   | PM       | COL5A2                        | Collagen Type V Alpha 2 Chain                             | EC        |
| GRINA                                                         | Glutamate Ionotropic Receptor NMDA Type Subunit Associated Protein 1 | PM       | DBT                           | Dihydroliipoamide Branched Chain Transacylase E2          | IC        |
| GRM1                                                          | Glutamate Metabotropic Receptor 1                                    | PM       | DDC                           | Dopa Decarboxylase                                        | EC        |
| GRM2                                                          | Glutamate Metabotropic Receptor 2                                    | PM       | DLAT                          | Dihydroliipoamide S-Acetyltransferase                     | IC        |
| GRM3                                                          | Glutamate Metabotropic Receptor 3                                    | PM       | IFNA1                         | Interferon Alpha 1                                        | EC        |
| GRM4                                                          | Glutamate Metabotropic Receptor 4                                    | PM       | KRT18                         | Keratin 18                                                | EC        |
| GRM7                                                          | Glutamate Metabotropic Receptor 7                                    | PM       | MPO                           | Myeloperoxidase                                           | EC        |
| GRM8                                                          | Glutamate Metabotropic Receptor 8                                    | PM       | NUP210                        | Nucleoporin 210                                           | IC        |
| KCNJ10                                                        | Potassium Voltage-Gated Channel Subfamily J Member 10 (Kir4.1)       | PM       | PRTN3                         | Proteinase 3                                              | EC/PM     |
| LG11                                                          | Leucine-rich glioma inactivated 1                                    | EC       | TGM2                          | Tissue Transglutaminase                                   | EC/PM     |
| MAG                                                           | Myelin Associated Glycoprotein                                       | PM       | TPO                           | Thyroid Peroxidase                                        | EC/PM     |
| MBP                                                           | Myelin Basic Protein                                                 | PM       | TSHR                          | Thyroid Stimulating Hormone Receptor                      | PM        |
| MOG                                                           | Myelin Oligodendrocyte Glycoprotein                                  | PM       | ZNF397                        | Zinc Finger Protein 397                                   | IC        |
| NEFL                                                          | Neurofilament Light                                                  | IC       |                               |                                                           |           |
| NOVA1                                                         | RNA-binding protein Nova-1 (Ri)                                      | IC       |                               |                                                           |           |
| OMG                                                           | Oligodendrocyte Myelin Glycoprotein                                  | PM       |                               |                                                           |           |

**Supplementary Table 1.** Full list of antigens printed on custom central nervous system protein microarray. *Location* relates to dominant subcellular location of expression derived from UniProtKB database. \* relates to proteins that were sourced externally from the HuProt library EC = extracellular, PM = plasma membrane, IC = intracellular

Supplementary Material

| Supplementary Table 2. Statistics for All Group Comparisons |                            |                |       |                                  |          |       |                         |          |  |
|-------------------------------------------------------------|----------------------------|----------------|-------|----------------------------------|----------|-------|-------------------------|----------|--|
| <b>Discovery</b>                                            | <i>Acute</i>               |                |       | <i>Subacute</i>                  |          |       |                         |          |  |
| Polyantigenic IgM                                           | -0.06                      | [-0.2- 0.13]   | 1.19  | [0.7-1.80]                       | p<0.0001 |       |                         |          |  |
| Polyantigenic IgG                                           | -0.34                      | [-0.47—0.15]   | -0.26 | [-0.42--0.09]                    | p=0.035  |       |                         |          |  |
| <b>Validation</b>                                           | <i>Acute</i>               |                |       | <i>Subacute</i>                  |          |       |                         |          |  |
| Polyantigenic IgM                                           | 0.14                       | [-0.44-0.28]   | 0.46  | [-0.14-1.35]                     | p<0.001  |       |                         |          |  |
| Polyantigenic IgG                                           | -0.18                      | [-0.50-0.26]   | 0.03  | [-0.37-0.50]                     | p=0.003  |       |                         |          |  |
| <b>Discovery</b>                                            | <i>Worse than Expected</i> |                |       | <i>As / Better than Expected</i> |          |       |                         |          |  |
| Polyantigenic IgM                                           | 2.74                       | [1.89-5.64]    | 1.46  | [0.41-2.72]                      | p=0.01   |       |                         |          |  |
| Ag Dominant IgM                                             | 1.5                        | [1-3]          | 2     | [0.5-5]                          | p=0.43   |       |                         |          |  |
| Ag Dominant IgG                                             | 1.5                        | [0-4.5]        | 1     | [0-6.5]                          | p=0.70   |       |                         |          |  |
| <b>Validation</b>                                           | <i>Worse than Expected</i> |                |       | <i>As / Better than Expected</i> |          |       |                         |          |  |
| Polyantigenic IgM                                           | 0.62                       | [-0.15-1.46]   | 0.21  | [-0.36-1.17]                     | p=0.15   |       |                         |          |  |
| Ag Dominant IgM                                             | 1                          | [0-2]          | 1     | [1-2]                            | p=0.67   |       |                         |          |  |
| Ag Dominant IgG                                             | 1                          | [0-2]          | 1     | [1-2.25]                         | p=0.33   |       |                         |          |  |
| <b>Col5a2 IgG</b>                                           | <i>Lung Contusions</i>     |                |       | <i>No Lung Contusions</i>        |          |       |                         |          |  |
| IgG                                                         | 1.6                        | [1.14-2.02]    | 1.11  | [1.00-1.17]                      | p=0.04   |       |                         |          |  |
| <b>Late</b>                                                 | <i>Late</i>                |                |       | <i>Healthy Controls</i>          |          |       |                         |          |  |
| NfL(pg/ml)                                                  | 31.1                       | [17.9-61.0]    | 6.8   | [5.6-10.7]                       | p<0.0001 |       |                         |          |  |
| GFAP (pg/ml)                                                | 73.6                       | [52.3-123.2]   | 55    | [38.3-79.4]                      | p=0.05   |       |                         |          |  |
|                                                             | <i>Late</i>                |                |       | <i>Day 0 Post-TBI</i>            |          |       | <i>Healthy Controls</i> |          |  |
| Polyantigenic IgM                                           | 0.54                       | [0.27-0.95]    | 0.28  | [0-0.52]                         | p=0.0002 | -0.27 | [-0.56-0.45]            | p<0.0001 |  |
| Polyantigenic IgG                                           | -0.14                      | [-0.27—0.01]   | -0.33 | [-0.45- -0.16]                   | p<0.0001 | -0.44 | [-0.53--0.32]           | p<0.0001 |  |
| <b>Long-term</b>                                            | <i>Long-term</i>           |                |       | <i>Healthy Controls</i>          |          |       |                         |          |  |
| NfL (pg/ml)                                                 | 15.8                       | [8.24-23.8]    | 14.4  | [10.3-17.9]                      | p=0.4    |       |                         |          |  |
| GFAP (pg/ml)                                                | 145                        | [110-250]      | 118   | [97-181]                         | p=0.11   |       |                         |          |  |
| Polyantigenic IgM                                           | -0.23                      | [-0.21- -0.31] | -0.31 | [-0.38- -0.3]                    | p=0.0002 |       |                         |          |  |
| Polyantigenic IgG                                           | -0.18                      | [-0.31- -0.11] | -0.37 | [-0.45- -0.28]                   | p<0.0001 |       |                         |          |  |
| MAG IgG                                                     | -0.35                      | [-0.69-0.17]   | -0.24 | [-0.61-0.22]                     | p=0.85   |       |                         |          |  |
| SELE IgG                                                    | -0.12                      | [-0.49-0.36]   | -0.23 | [-0.53-0.46]                     | p=0.83   |       |                         |          |  |
| MAG IgM                                                     | -0.26                      | [-0.58-0.25]   | -0.24 | [-0.53-0.35]                     | p=0.76   |       |                         |          |  |

**Supplementary Table 2.** Values for statistics quoted in body of main text. “Polyantigenic” values refer to the median Z score per patient, “Ag (antigen) dominant” values refers to the number of dominant antibodies against specific antigens detected per patient. MAG/SELE values refer to the Z scores of the particular antigen-specific autoantibody. All values represent Median [IQR].
